# Supplementary material for: Decisive role of heavy-atom orientation for efficient enhancement of spin–orbit coupling in organic thermally activated delayed fluorescence emitters
Source: Royal Society of Chemistry journal article supplement (doi:10.1039/d2tc01729f), 2022-01-01
Supplement: d2tc01729f1.pdf [file d2tc01729f1.pdf]

## Supporting information

### **Decisive Role of Heavy-Atom Orientation for Efficient Enhancement of Spin-Orbit Coupling in Organic Thermally Activated Delayed Fluorescence Emitters**

Michał Mońka,<sup>1</sup> Daria Grzywacz,<sup>2</sup> Estera Hoffman,<sup>1</sup> Vladyslav Ievtukhov,<sup>2</sup> Karol Kozakiewicz,<sup>2</sup>  
Radosław Rogowski,<sup>1</sup> Aleksander Kubicki,<sup>1</sup> Beata Liberek,<sup>2</sup> Piotr Bojarski,<sup>1</sup> Illia E. Serdiuk<sup>1\*</sup>

<sup>1</sup> Faculty of Mathematics, Physics and Informatics, University of Gdańsk, Wita Stwosza 57, 80-308  
Gdańsk, Poland

<sup>2</sup> Faculty of Chemistry, University of Gdańsk, Wita Stwosza 63, 80-308 Gdańsk, Poland

\*Corresponding author. E-mail: illia.serdiuk@ug.edu.pl, phone + 48 58 523 22 44

### **Table of contents**

|                    |                                                  |
|--------------------|--------------------------------------------------|
| <b>Section S1:</b> | <b>Photophysical measurements</b>                |
| <b>Section S2:</b> | <b>Quantum chemical calculations</b>             |
| <b>Section S3:</b> | <b>NMR spectra of target emitters</b>            |
| <b>Section S4</b>  | <b>Determination of photophysical parameters</b> |

## Section S1: Photophysical measurements

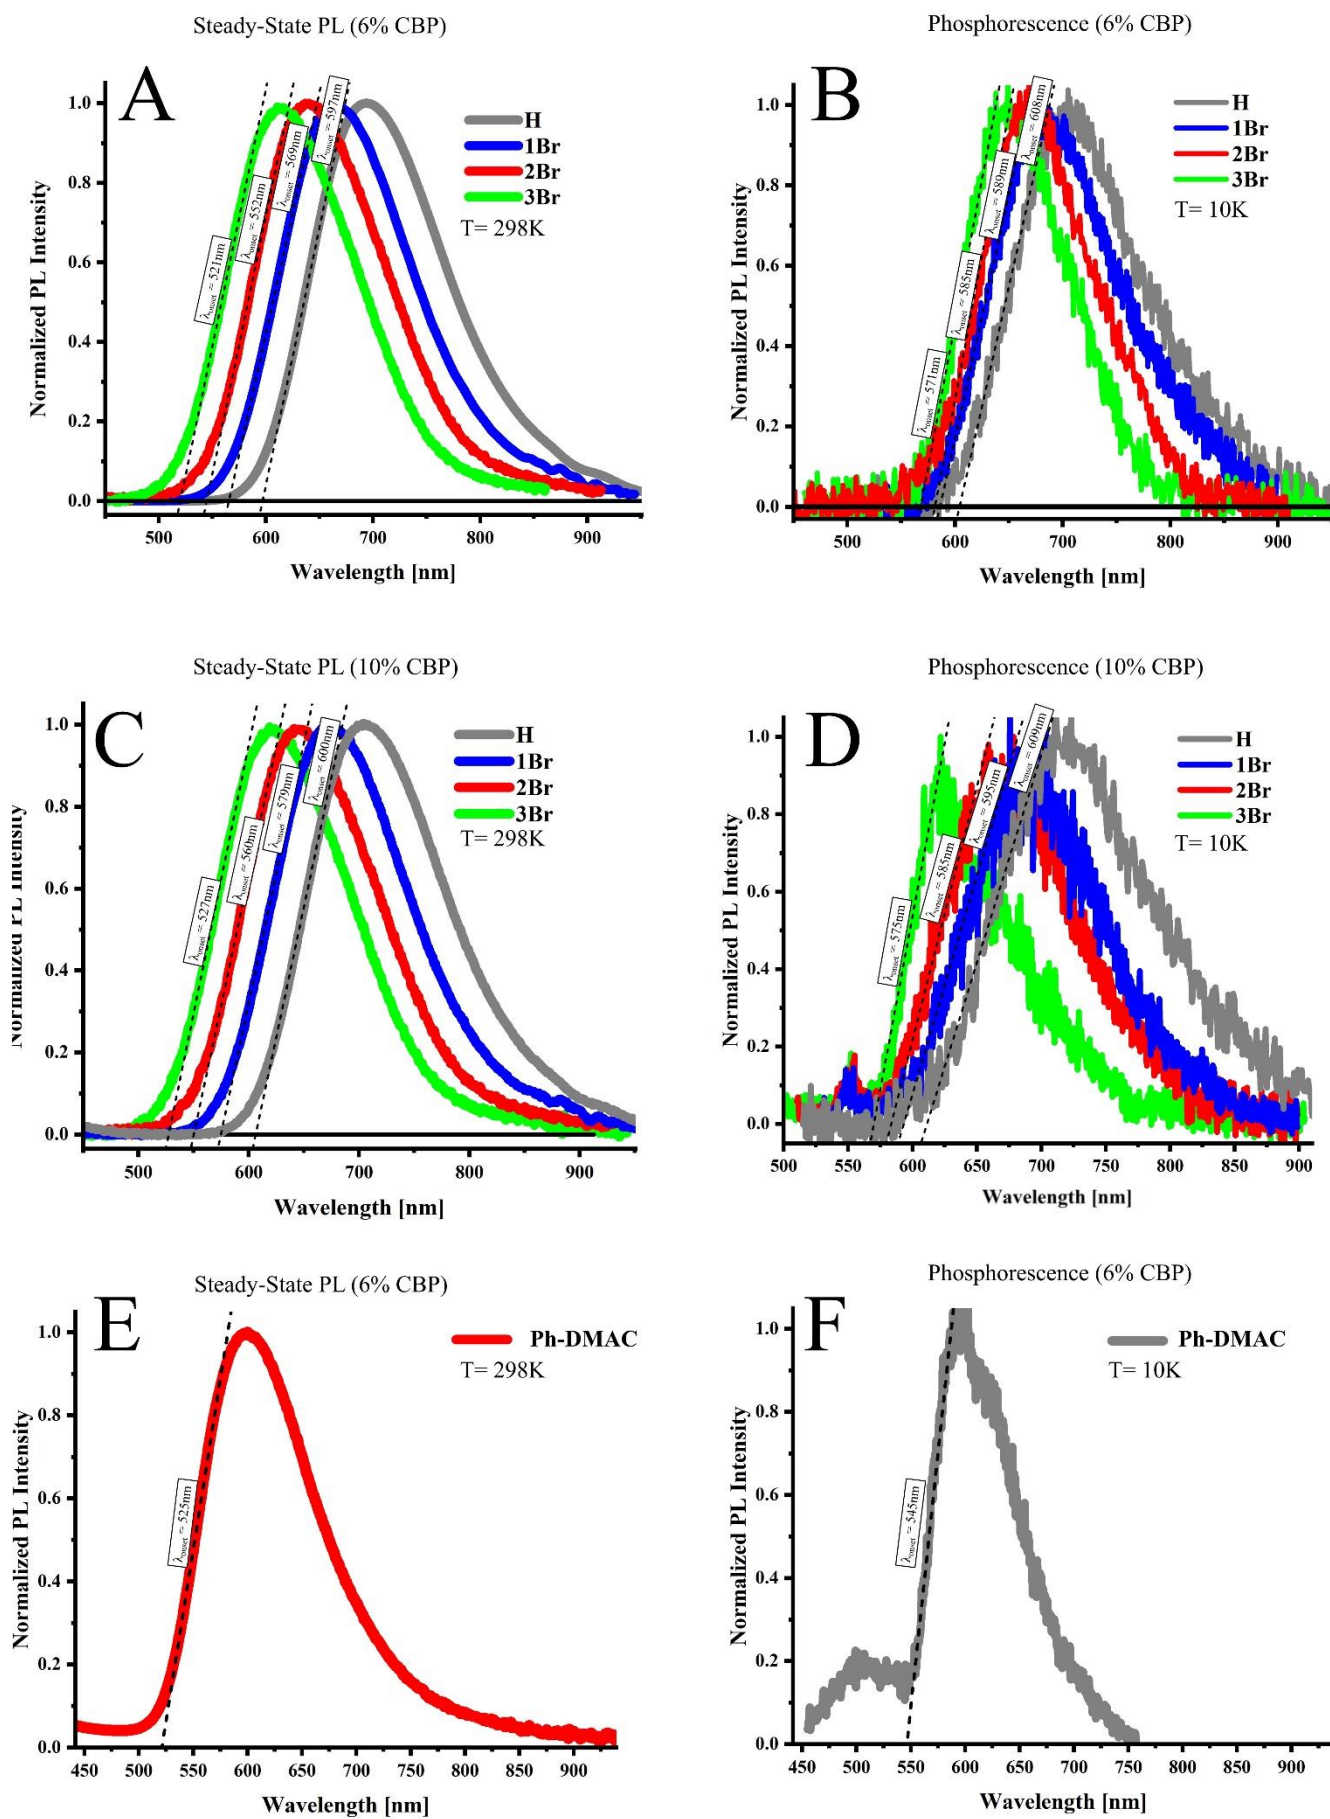

**Figure S1.** Steady-State PL spectra of investigated compounds: 6% (A, E) and 10% (C) CBP with onsets and phosphorescence spectra measured in 10K, 6% (B, F) and 10% (D) CBP.

**Table S1.** Experimental determination of  $^1\text{CT}$ ,  $^3\text{CT}$  and  $^3\text{LE}$  - onset values.

|            | Fluorescence       |                          | Phosphorescence      |                          | $\Delta E_{1\text{CT}-3\text{CT}}$ | Phosphorescence      |                          |                      |                                    |       |
|------------|--------------------|--------------------------|----------------------|--------------------------|------------------------------------|----------------------|--------------------------|----------------------|------------------------------------|-------|
|            | $w_{\text{X/CBP}}$ | $\lambda_{\text{onset}}$ | $^1\text{CT energy}$ | $\lambda_{\text{onset}}$ |                                    | $^3\text{CT energy}$ | $\lambda_{\text{onset}}$ | $^3\text{LE energy}$ | $\Delta E_{1\text{CT}-3\text{LE}}$ |       |
|            |                    | [nm]                     | [eV]                 | [nm]                     | [eV]                               | [eV]                 | [nm]                     | [eV]                 | [eV]                               |       |
| <b>H</b>   | 6%                 | 597                      | 2.07                 | 608                      | 2.04                               | 0.04                 | <b>ZNX</b><br>0.1%       | 552                  | 2.25                               | -0.18 |
|            | 10%                | 600                      | 2.07                 | 609                      | 2.04                               | 0.03                 |                          | 552                  | 2.25                               | -0.07 |
| <b>1Br</b> | 6%                 | 569                      | 2.18                 | 589                      | 2.10                               | 0.08                 |                          | 552                  | 2.25                               | -0.07 |
|            | 10%                | 579                      | 2.14                 | 595                      | 2.08                               | 0.06                 |                          | 552                  | 2.25                               | 0.00  |
| <b>2Br</b> | 6%                 | 552                      | 2.25                 | 585                      | 2.12                               | 0.13                 |                          | 552                  | 2.25                               | 0.00  |
|            | 10%                | 560                      | 2.21                 | 585                      | 2.11                               | 0.10                 |                          | 552                  | 2.25                               | 0.13  |
| <b>3Br</b> | 6%                 | 521                      | 2.37                 | 571                      | 2.17                               | 0.20                 | 552                      | 2.25                 | 0.13                               |       |
|            | 10%                | 527                      | 2.35                 | 575                      | 2.16                               | 0.19                 |                          |                      |                                    |       |

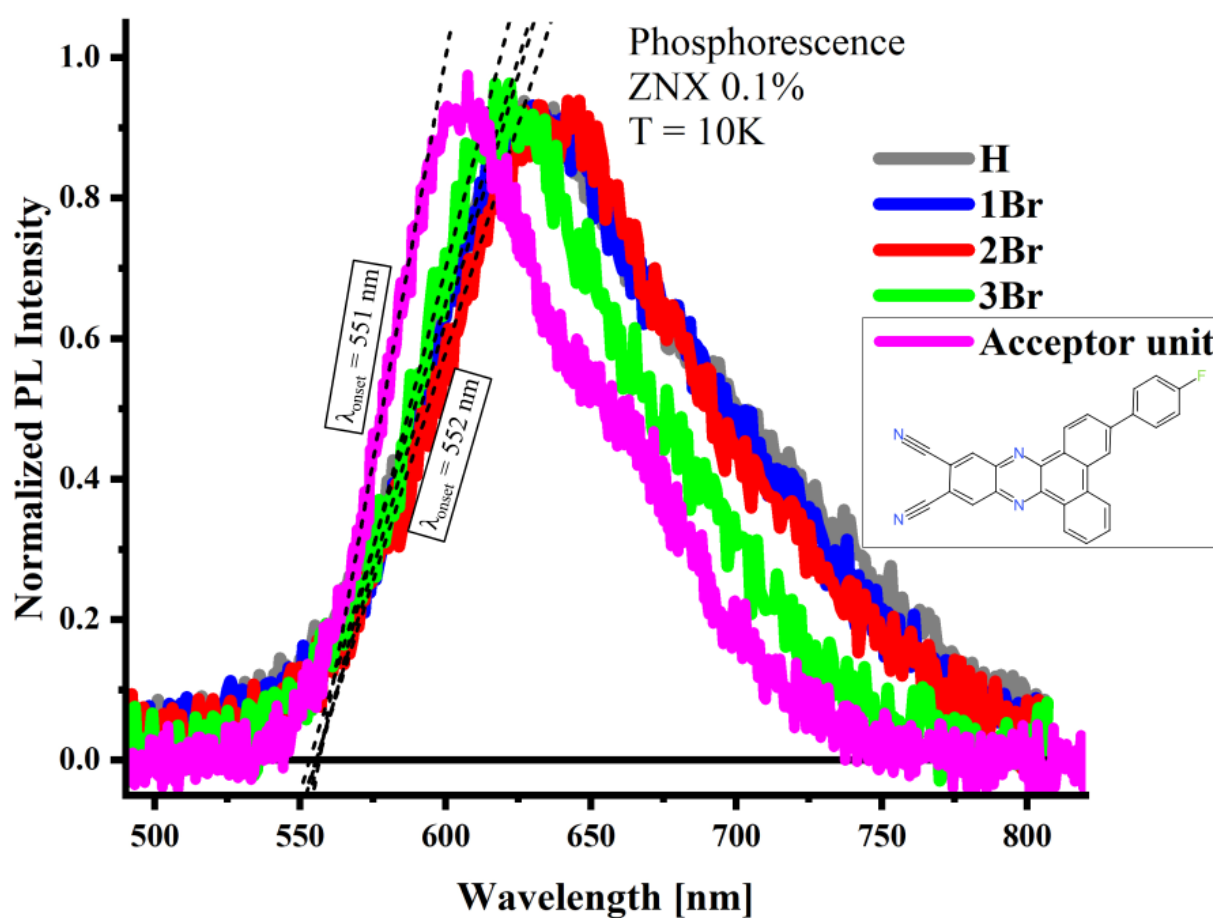

**Figure S2.** Phosphorescence spectra of investigated compounds dispersed in ZNX, measured in 10K under excitation wavelength  $\lambda_{\text{exc}} = 370$  nm with a 20ms delay after excitation pulse.

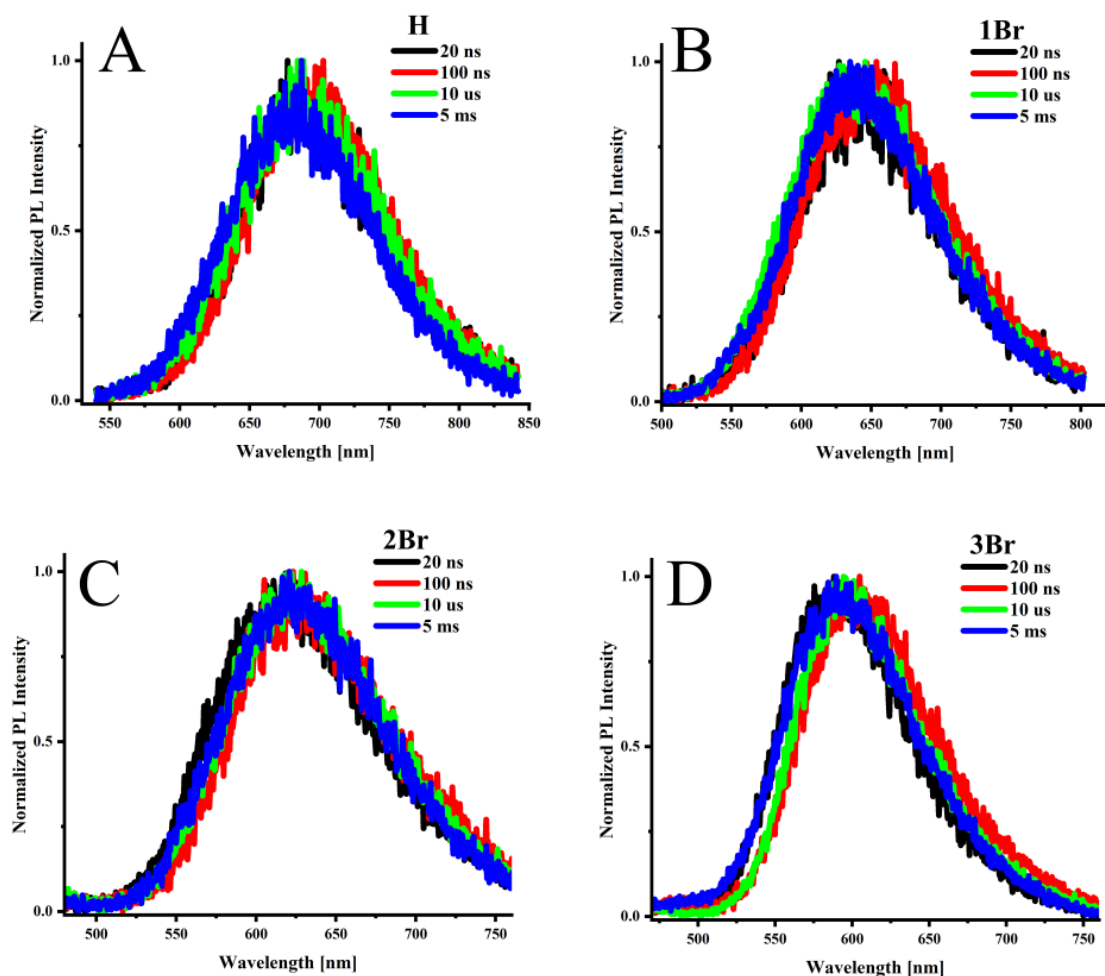

**Figure S3.** PL spectra of **H** (A), **1Br** (B), **2Br** (C), and **3Br** (D) in 6% CBP, taken at different time delays.

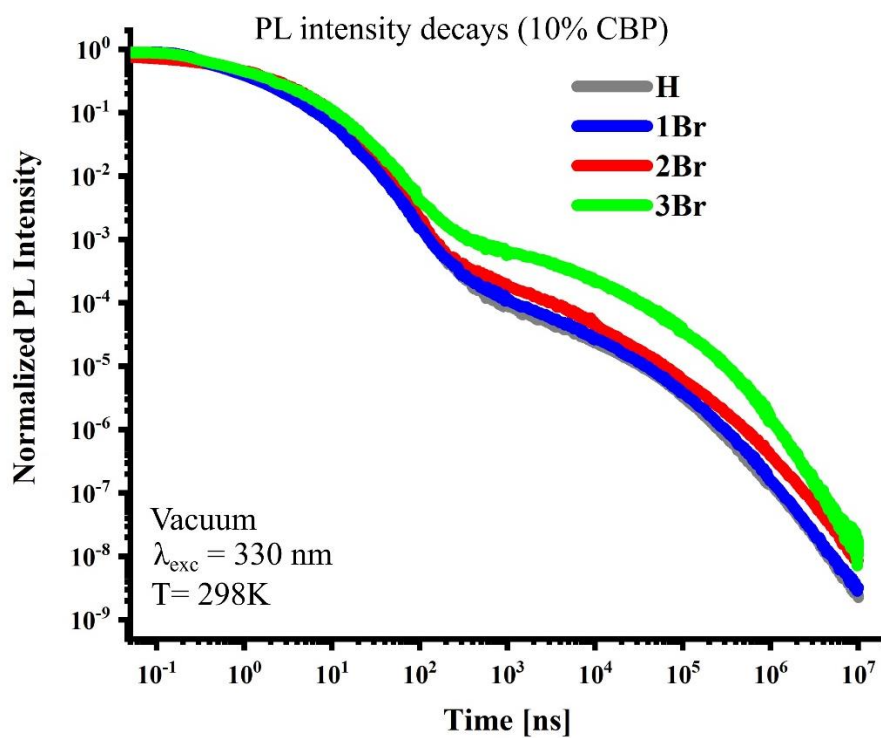

**Figure S4.** PL intensity decays of investigated compounds (10% CBP) measured in vacuum under excitation wavelength  $\lambda_{exc} = 330$  nm.

## Section S2: Quantum chemical calculations

Theoretical rate constants of rISC were calculated using Marcus-Hush equation:

$$k_{(r)ISC} = \frac{V^2}{\hbar} \sqrt{\frac{\pi}{k_B T \lambda}} \exp \left[ -\frac{(\Delta E_{ST} + \lambda)^2}{4k_B T \lambda} \right], \quad (\text{S1})$$

where  $V$  is SOC constant,  $\hbar$  is reduced Planck constant,  $\lambda$  is sum of internal  $\lambda_{\text{int}}$  and external ( $\lambda_{\text{solv}}$ ) reorganization energies for respective transition (in our calculations we assumed  $\lambda_{\text{solv}} = 0.3$  eV)  $\Delta E_{ST}$  is the energy gap between singlet and respective triplet state,  $k_B$  stands for Boltzmann constant,  $T$  is temperature.

Relative contribution of  $i$ -th rotamers in **H**, **1Br**, **2Br** and **3Br**-rotamers was calculated using Boltzmann distribution law:

$$\mu_i [\%] = \frac{\exp \left( -\frac{\Delta E_i}{k_B T} \right)}{\sum_{i=1}^N \exp \left( -\frac{\Delta E_i}{k_B T} \right)}, \quad (\text{S2})$$

where  $N$  is the number of existing isomers (for **H**, **1Br**, **2Br** and **3Br**-rotamers  $N = 2, 16, 16$  and  $32$ , respectively),  $\Delta E_i$  denotes the energy difference between  $i$ -th rotamer and most stable rotamer (with lowest energy). Procedure for theoretical prediction rate constants described in details in [1].

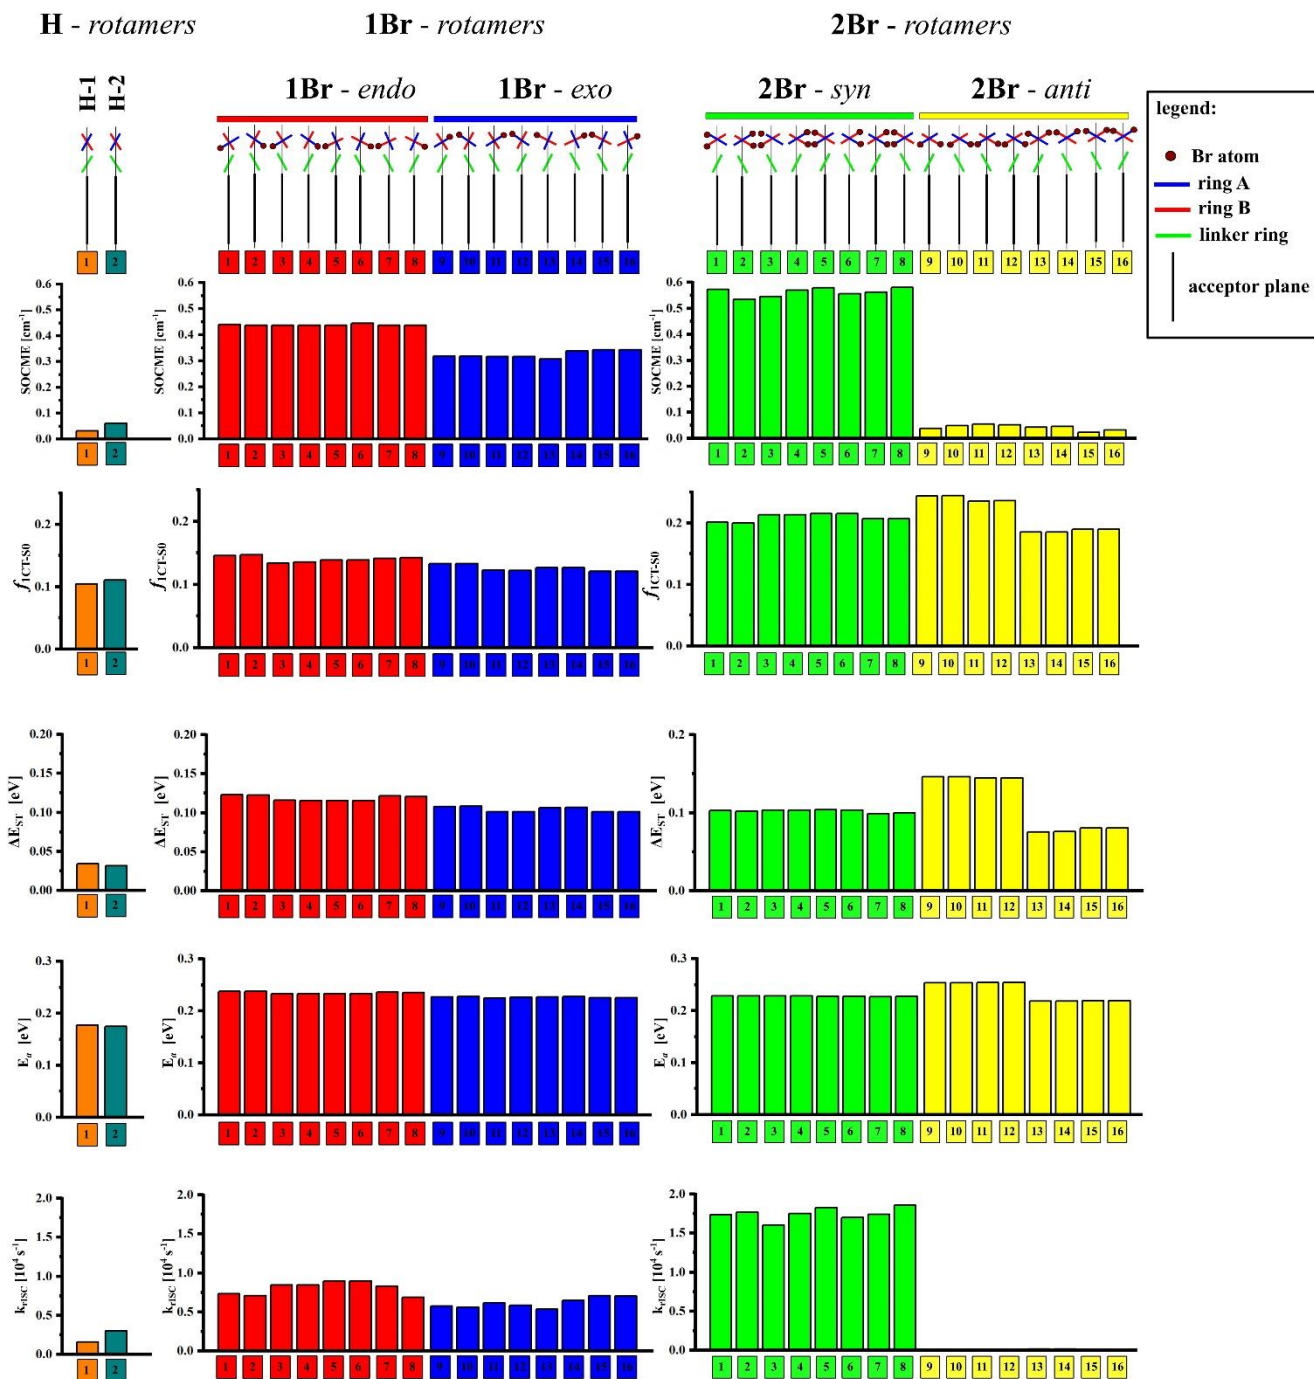

**Figure S5.** Calculated electronic parameters of all **H**, **1Br** and **2Br** – rotamers. In main text, key rotamers (depicted in **Figure 5**, **Table 3**) from each group: **H-rotamers**: **1** (as **H-1**) and **2** (as **H-2**); **1Br-rotamers**: **3** (as **1Br-endo**) and **12** (as **1Br-exo**); **2Br-rotamers**: **5** (as **2Br-syn**) and **9** (as **2Br-anti**).



### 3Br - rotamers

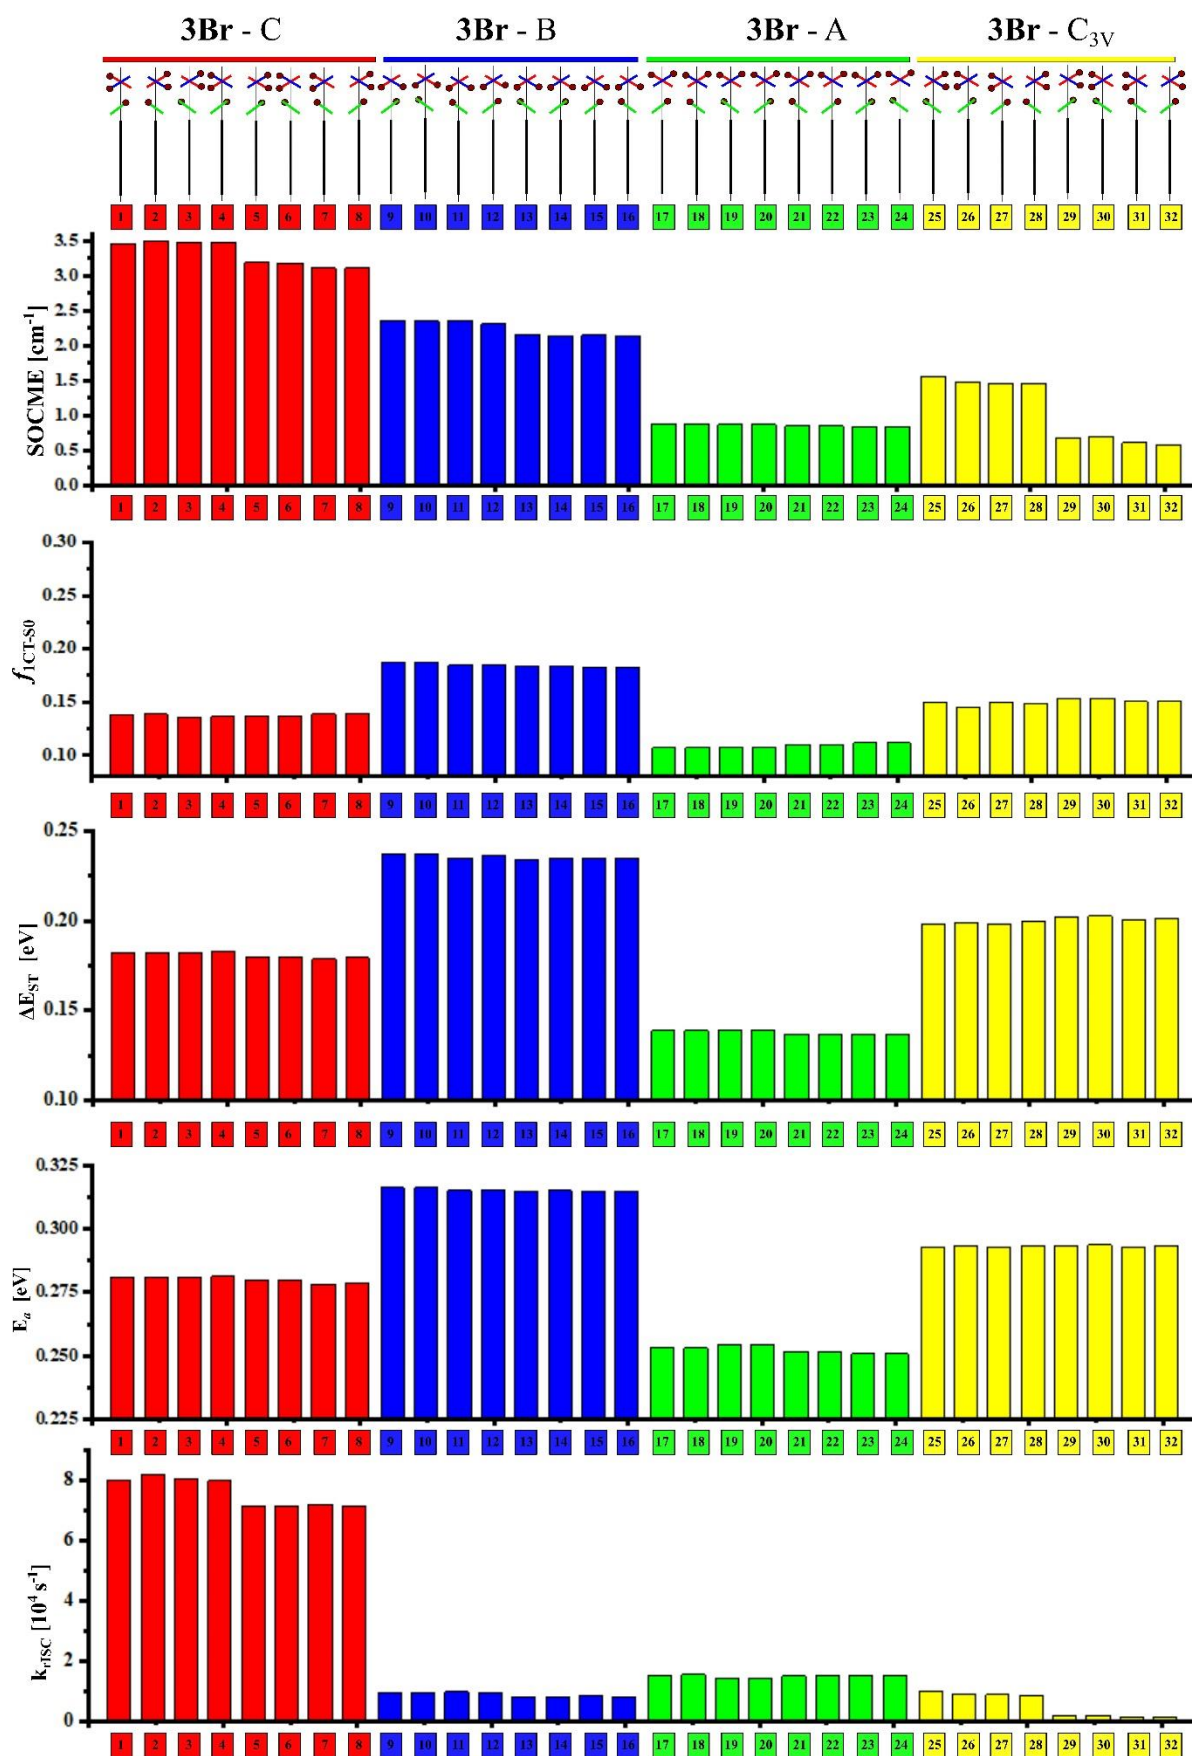

**Figure S6.** Calculated electronic parameters of all 3Br rotamers. In main text, key rotamers (depicted in **Figure 5**, **Table 3**) from 3Br-rotamers group: **32** (as 3Br-C<sub>3V</sub>), **17** (as 3Br-A), **21** (as 3Br-A), **12** (as 3Br-B), **1** (as 3Br-C).

**Table S2.** Calculated values of different geometry (dihedrals  $\theta_L$ ,  $\theta_A$ , and  $\theta_B$ ) and electronic parameters (plotted in **Figures S5** and **S6**) of all rotamers.

| H - rotamers                                 | 1     | 2     | X <sup>a</sup> |
|----------------------------------------------|-------|-------|----------------|
| SOC <sub>T1-S1</sub> [cm <sup>-1</sup> ]     | 0.06  | 0.08  | --             |
| $\Delta E_{3CT-1CT}$ [eV]                    | 0.03  | 0.03  | <b>0.03</b>    |
| $f_{S1-S0}$                                  | 0.10  | 0.11  | <b>0.107</b>   |
| $E_a$ [eV]                                   | 0.18  | 0.17  | --             |
| $\mu$ [%]                                    | 67.2  | 32.8  | --             |
| $k_{ISC}$ [10 <sup>4</sup> s <sup>-1</sup> ] | 0.16  | 0.30  | <b>0.20</b>    |
| $\theta_L$                                   | 27.9  | -28.8 |                |
| $\theta_A$                                   | -64.6 | -65.1 |                |
| $\theta_B$                                   | -64.8 | -65.2 |                |

  

| 1Br- rotamers                                | 1     | 2     | 3     | 4    | 5    | 6     | 7     | 8     | 9     | 10    | 11    | 12    | 13    | 14    | 15    | 16    | X <sup>a</sup> |
|----------------------------------------------|-------|-------|-------|------|------|-------|-------|-------|-------|-------|-------|-------|-------|-------|-------|-------|----------------|
| SOC <sub>T1-S1</sub> [cm <sup>-1</sup> ]     | 0.44  | 0.43  | 0.44  | 0.44 | 0.44 | 0.44  | 0.45  | 0.41  | 0.32  | 0.32  | 0.32  | 0.32  | 0.31  | 0.34  | 0.34  | 0.34  | --             |
| $\Delta E_{3CT-1CT}$ [eV]                    | 0.12  | 0.12  | 0.12  | 0.12 | 0.12 | 0.12  | 0.12  | 0.12  | 0.11  | 0.11  | 0.10  | 0.10  | 0.11  | 0.11  | 0.10  | 0.10  | <b>0.11</b>    |
| $f_{S1-S0}$                                  | 0.15  | 0.15  | 0.13  | 0.14 | 0.14 | 0.14  | 0.14  | 0.14  | 0.13  | 0.13  | 0.12  | 0.12  | 0.13  | 0.13  | 0.12  | 0.12  | <b>0.131</b>   |
| $E_a$ [eV]                                   | 0.24  | 0.24  | 0.23  | 0.23 | 0.23 | 0.23  | 0.24  | 0.24  | 0.23  | 0.23  | 0.22  | 0.23  | 0.23  | 0.23  | 0.23  | 0.23  | --             |
| $\mu$ [%]                                    | 7.0   | 4.3   | 1.5   | 2.0  | 7.3  | 10.6  | 3.9   | 21.8  | 7.6   | 2.1   | 9.0   | 3.3   | 6.6   | 5.0   | 3.0   | 5.1   | --             |
| $k_{ISC}$ [10 <sup>4</sup> s <sup>-1</sup> ] | 0.7   | 0.7   | 0.8   | 0.8  | 0.9  | 0.9   | 0.8   | 0.7   | 0.6   | 0.6   | 0.6   | 0.6   | 0.5   | 0.6   | 0.7   | 0.7   | <b>0.71</b>    |
| $\theta_L$                                   | 21.3  | -21.1 | -22.6 | 22.5 | 22.3 | -22.3 | -22.6 | 22.7  | 23.2  | -23.1 | -23.0 | 22.4  | 23.6  | -23.6 | -21.9 | 21.9  |                |
| $\theta_A$                                   | -74.6 | 74.7  | -74.9 | 74.9 | 56.0 | -56.0 | 55.9  | -55.9 | 69.2  | -69.1 | 68.4  | -68.8 | -55.3 | 55.2  | -55.3 | 55.2  |                |
| $\theta_B$                                   | -56.1 | 56.5  | -56.1 | 56.2 | 75.1 | -75.1 | 74.9  | -74.9 | -55.4 | 55.3  | -55.3 | 55.1  | 69.5  | -69.2 | 69.0  | -68.8 |                |

  

| 2Br- rotamers                                | 1     | 2     | 3     | 4     | 5     | 6     | 7     | 8     | 9     | 10    | 11    | 12   | 13    | 14    | 15    | 16    | X <sup>a</sup> |
|----------------------------------------------|-------|-------|-------|-------|-------|-------|-------|-------|-------|-------|-------|------|-------|-------|-------|-------|----------------|
| SOC <sub>T1-S1</sub> [cm <sup>-1</sup> ]     | 0.57  | 0.53  | 0.54  | 0.57  | 0.58  | 0.56  | 0.56  | 0.58  | 0.04  | 0.05  | 0.05  | 0.05 | 0.04  | 0.05  | 0.02  | 0.03  | --             |
| $\Delta E_{3CT-1CT}$ [eV]                    | 0.10  | 0.10  | 0.10  | 0.10  | 0.10  | 0.10  | 0.10  | 0.10  | 0.15  | 0.15  | 0.14  | 0.14 | 0.08  | 0.08  | 0.08  | 0.08  | <b>0.13</b>    |
| $f_{S1-S0}$                                  | 0.20  | 0.20  | 0.21  | 0.21  | 0.22  | 0.22  | 0.21  | 0.21  | 0.24  | 0.24  | 0.24  | 0.24 | 0.19  | 0.19  | 0.19  | 0.19  | <b>0.216</b>   |
| $E_a$ [eV]                                   | 0.23  | 0.23  | 0.23  | 0.23  | 0.23  | 0.23  | 0.23  | 0.23  | 0.25  | 0.25  | 0.25  | 0.25 | 0.22  | 0.22  | 0.22  | 0.22  | --             |
| $\mu$ [%]                                    | 0.8   | 3.3   | 1.1   | 1.1   | 7.2   | 1.5   | 1.6   | 5.0   | 12.1  | 8.3   | 27.5  | 27.8 | 1.0   | 0.8   | 0.4   | 0.4   | --             |
| $k_{ISC}$ [10 <sup>4</sup> s <sup>-1</sup> ] | 1.7   | 1.8   | 1.6   | 1.8   | 1.8   | 1.7   | 1.7   | 1.9   | 0.0   | 0.0   | 0.0   | 0.0  | 0.0   | 0.0   | 0.0   | 0.0   | <b>0.40</b>    |
| $\theta_L$                                   | 16.2  | -16.1 | -18.0 | 17.8  | 17.8  | -17.9 | -16.3 | 16.8  | 17.6  | -17.7 | -15.1 | 15.1 | 17.2  | -17.1 | -18.2 | 18.2  |                |
| $\theta_A$                                   | -77.5 | 77.5  | -77.3 | 77.2  | -63.5 | 63.5  | -63.3 | 63.4  | -68.5 | 68.5  | -68.3 | 68.3 | -78.4 | 78.2  | -78.9 | -68.7 |                |
| $\theta_B$                                   | 63.3  | -63.2 | 63.1  | -63.2 | 77.3  | -77.4 | 77.1  | -77.1 | -68.4 | 68.3  | -68.3 | 68.3 | -78.1 | 78.2  | -78.4 | 78.4  |                |

  

| 3Br- rotamers                                | 1     | 2     | 3     | 4     | 5     | 6     | 7     | 8     | 9     | 10    | 11    | 12    | 13   | 14    | 15    | 16    | 17   | 18    | 19    | 20    | 21    | 22    | 23    | 24    | 25    | 26    | 27    | 28    | 29    | 30    | 31    | 32    | X <sup>a</sup> |
|----------------------------------------------|-------|-------|-------|-------|-------|-------|-------|-------|-------|-------|-------|-------|------|-------|-------|-------|------|-------|-------|-------|-------|-------|-------|-------|-------|-------|-------|-------|-------|-------|-------|-------|----------------|
| SOC <sub>T1-S1</sub> [cm <sup>-1</sup> ]     | 3.45  | 3.50  | 3.47  | 3.48  | 3.19  | 3.18  | 3.11  | 3.11  | 2.35  | 2.35  | 2.36  | 2.31  | 2.15 | 2.14  | 2.15  | 2.14  | 0.88 | 0.88  | 0.87  | 0.87  | 0.85  | 0.85  | 0.84  | 0.84  | 1.56  | 1.48  | 1.46  | 1.46  | 0.68  | 0.69  | 0.61  | 0.58  | --             |
| $\Delta E_{3CT-1CT}$ [eV]                    | 0.18  | 0.18  | 0.18  | 0.18  | 0.18  | 0.18  | 0.18  | 0.18  | 0.24  | 0.24  | 0.24  | 0.24  | 0.23 | 0.23  | 0.23  | 0.23  | 0.14 | 0.14  | 0.14  | 0.14  | 0.14  | 0.14  | 0.14  | 0.14  | 0.20  | 0.20  | 0.20  | 0.20  | 0.20  | 0.20  | 0.20  | 0.20  | <b>0.20</b>    |
| $f_{S1-S0}$                                  | 0.14  | 0.14  | 0.14  | 0.14  | 0.14  | 0.14  | 0.14  | 0.14  | 0.19  | 0.19  | 0.18  | 0.19  | 0.18 | 0.18  | 0.18  | 0.18  | 0.11 | 0.11  | 0.11  | 0.11  | 0.11  | 0.11  | 0.11  | 0.11  | 0.15  | 0.15  | 0.15  | 0.15  | 0.15  | 0.15  | 0.15  | 0.15  | <b>0.118</b>   |
| $E_a$ [eV]                                   | 0.28  | 0.28  | 0.28  | 0.28  | 0.28  | 0.28  | 0.28  | 0.28  | 0.32  | 0.32  | 0.32  | 0.32  | 0.31 | 0.32  | 0.31  | 0.31  | 0.25 | 0.25  | 0.25  | 0.25  | 0.25  | 0.25  | 0.25  | 0.25  | 0.29  | 0.29  | 0.29  | 0.29  | 0.29  | 0.29  | 0.29  | 0.29  | --             |
| $\mu$ [%]                                    | 6.90  | 0.92  | 2.12  | 1.97  | 1.12  | 0.95  | 2.49  | 2.67  | 2.18  | 2.18  | 3.86  | 4.14  | 4.63 | 4.61  | 14.68 | 2.94  | 0.41 | 0.46  | 0.74  | 0.67  | 0.56  | 1.96  | 0.70  | 0.65  | 4.13  | 3.48  | 3.53  | 3.57  | 5.66  | 10.15 | 2.73  | 2.24  | --             |
| $k_{ISC}$ [10 <sup>4</sup> s <sup>-1</sup> ] | 8.0   | 8.2   | 8.0   | 8.0   | 7.1   | 7.1   | 7.2   | 7.1   | 0.9   | 0.9   | 1.0   | 0.9   | 0.8  | 0.8   | 0.8   | 0.8   | 1.5  | 1.6   | 1.4   | 1.5   | 1.5   | 1.5   | 1.5   | 1.5   | 1.0   | 0.9   | 0.9   | 0.2   | 0.2   | 0.2   | 0.2   | 0.1   | <b>2.09</b>    |
| $\theta_L$                                   | 18.1  | -18.2 | 17.5  | -17.5 | -16.9 | 16.9  | -17.3 | 17.3  | -16.6 | 16.6  | -17.7 | 17.8  | 15.5 | -15.5 | 15.7  | -15.6 | 19.5 | -19.7 | 17.5  | -17.4 | -18.0 | 18.0  | -18.8 | 18.8  | 16.1  | -15.8 | 14.5  | -14.3 | -17.7 | 17.6  | -19.0 | 18.9  |                |
| $\theta_A$                                   | -71.0 | 71.0  | 61.2  | -61.2 | 60.9  | -60.9 | -71.5 | 71.5  | 77.8  | -77.8 | 77.8  | -77.5 | 77.9 | -77.9 | 78.0  | -77.9 | 76.5 | -76.4 | -83.5 | -61.8 | 75.9  | -75.9 | 61.0  | -61.0 | 75.4  | -75.3 | -75.8 | 75.9  | 75.1  | -75.1 | 74.8  | 76.6  |                |
| $\theta_B$                                   | 61.4  | -61.3 | -70.9 | 70.9  | -71.4 | 71.4  | 60.9  | -60.9 | 73.6  | -73.6 | 73.6  | -73.6 | 74.0 | -74.0 | 74.0  | -74.0 | 61.7 | -61.7 | 76.8  | -76.7 | 60.8  | -60.8 | 75.5  | -75.5 | -75.7 | 75.7  | 75.2  | -75.1 | -76.2 | 76.3  | -76.6 | -74.8 |                |

<sup>a</sup> – statistical mean values (weighted using Boltzmann distribution law - equation S2);

SOC<sub>T1-S1</sub> [cm<sup>-1</sup>] – SOC constant value for 3CT → 1CT transition;

$\Delta E_{3CT-1CT}$  [eV] – Energy gap between <sup>3</sup>CT and <sup>1</sup>CT excited states;

$f_{S1-S0}$  – oscillator strength;

$E_a$  [eV] – Activation energy;

$\mu$  [%] – relative contribution estimated using Boltzmann distribution law - equation S2);

$k_{ISC}$  [10<sup>4</sup> s<sup>-1</sup>] – calculated rate constant for <sup>3</sup>CT → <sup>1</sup>CT transition.

$\theta_L$   $\theta_A$   $\theta_B$  – dihedral angles (**Figure 3**)



**Calculations of the  ${}^3\text{LE} \rightarrow {}^1\text{CT}$  rate constants.** To verify whether  ${}^3\text{LE} \rightarrow {}^1\text{CT}$  channel has an impact on rISC, we performed theoretical calculations of its rate constants ( $k_{3\text{LE-1CT}}$ ) using Marcus-Hush equation (S1) and experimental  $\Delta E_{3\text{LE-1CT}}$  values. Since we consider two triplet states from which rISC is potentially possible, at first, we estimated relative population of these levels using Boltzmann distribution law:

$$\chi_i[\%] = \frac{\exp\left(-\frac{\Delta E_i}{k_B T}\right)}{\sum_{i=1}^N \exp\left(-\frac{\Delta E_i}{k_B T}\right)}, \quad (\text{S3})$$

where  $\Delta E_i$  denotes the energy difference between lowest triplet state ( $T_1$ ) and respective triplet state ( $T_i$ ):

$$\Delta E_i = (T_i - T_1), \quad (\text{S4})$$

$$a_i = \exp\left(-\frac{(T_i - T_1)}{k_B T}\right). \quad (\text{S5})$$

**Table S3.** Theoretical constant rates  $k_{3\text{LE-1CT}}$  with determined population of lowest triplet excited states of emitters.

| CBP 10%                              |       |                      |                          |       |                        |                     |                           |                                           |             |
|--------------------------------------|-------|----------------------|--------------------------|-------|------------------------|---------------------|---------------------------|-------------------------------------------|-------------|
| Alignment of triplet excited states: |       |                      | $T_2 = {}^3\text{LE(A)}$ |       |                        |                     |                           |                                           |             |
|                                      |       |                      | $T_1 = {}^3\text{CT}$    |       |                        |                     |                           |                                           |             |
|                                      |       |                      |                          |       | ${}^3\text{LE(A)}$     | ${}^3\text{CT}$     |                           |                                           |             |
| $T_1$                                | $T_2$ | $\Delta E_{T_2-T_1}$ | $a_1$                    | $a_2$ | $\chi_{3\text{LE(A)}}$ | $\chi_{3\text{CT}}$ | $k_{3\text{LE-1CT}}$      | $\chi_{3\text{LE(A)}} k_{3\text{LE-1CT}}$ |             |
| [eV]                                 | [eV]  | [eV]                 |                          |       | [%]                    | [%]                 | [ $10^4 \text{ s}^{-1}$ ] | [ $10^4 \text{ s}^{-1}$ ]                 |             |
| <b>H</b>                             | 2.03  | 2.25                 | 0.22                     | 1     | 0.0003                 | 0.03                | 99.97                     | 186.2                                     | <b>0.04</b> |
| <b>1Br</b>                           | 2.08  | 2.25                 | 0.17                     | 1     | 0.0018                 | 0.18                | 99.82                     | 24.4                                      | <b>0.03</b> |
| <b>2Br</b>                           | 2.11  | 2.25                 | 0.14                     | 1     | 0.0070                 | 0.70                | 99.30                     | 1.1                                       | <b>0.01</b> |
| <b>3Br</b>                           | 2.16  | 2.25                 | 0.09                     | 1     | 0.0281                 | 2.92                | 97.08                     | 3.8                                       | <b>0.10</b> |

From the results included in Table S3, it can be seen, that population of triplet states is strongly dominated by  ${}^3\text{CT}$  state due to large difference in energies between  ${}^3\text{CT}$  and  ${}^3\text{LE}$  levels.

Next, values of  $k_{3\text{LE-1CT}}$  for each emitter were calculated just as  $k_{3\text{CT-1CT}}$ , taking into account population of  ${}^3\text{LE}$  state  $\chi_{3\text{LE(A)}}$ . Results are presented in **Table S3** and **Figure 4**.

Since theoretical predictions of rISC constant rates based on exclusively  ${}^3\text{LE-1CT}$  channel did not showed a good correlation with experimental values, we conclude that  ${}^3\text{LE-1CT}$  channel has not considerable impact on rISC in most of the cases except for the rotamers with very low rates of  ${}^3\text{CT-1CT}$  transition as **2Br-anti** ones.

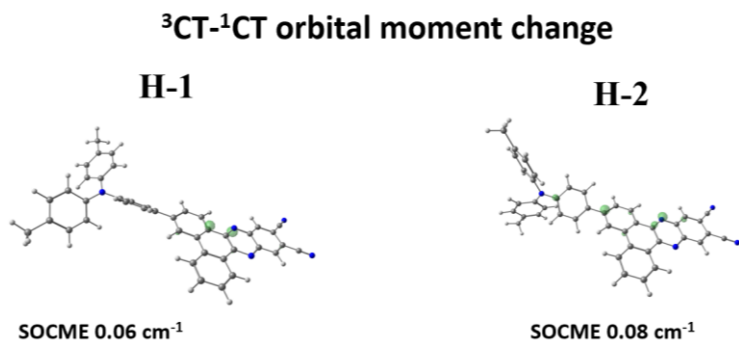

**Figure S7.** Differences in the orbital transition moment of **H** rotamers. *\*note that contour value is 0.01 (high)*

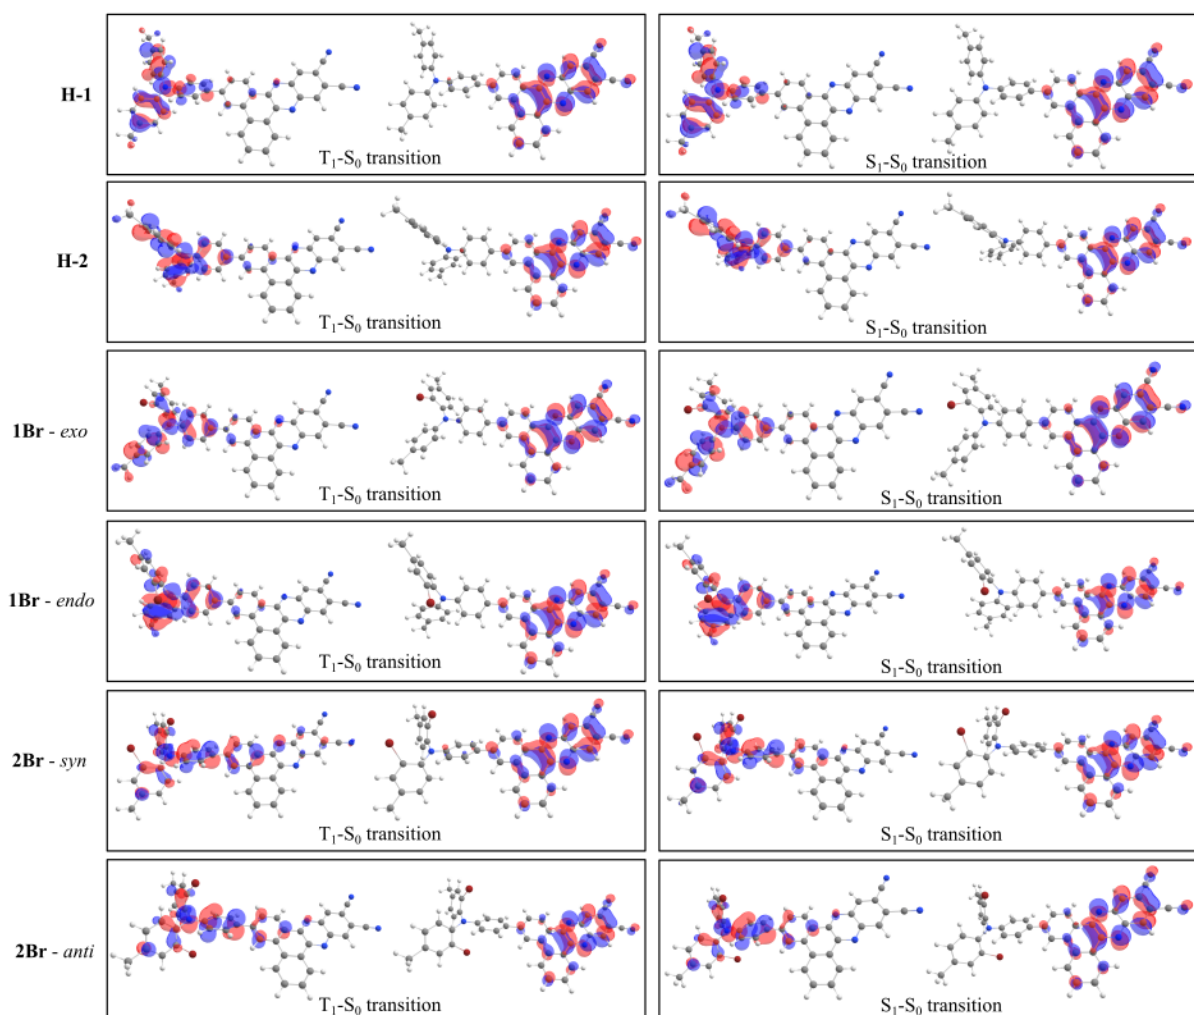

**Figure S8.** Natural transition orbitals for the  $S_1\text{-}S_0$  and  $T_1\text{-}S_0$  transitions for selected **H**, **1Br** and **2Br** rotamers. NTO indicate almost negligible role of bromine atoms in the electronic transitions.

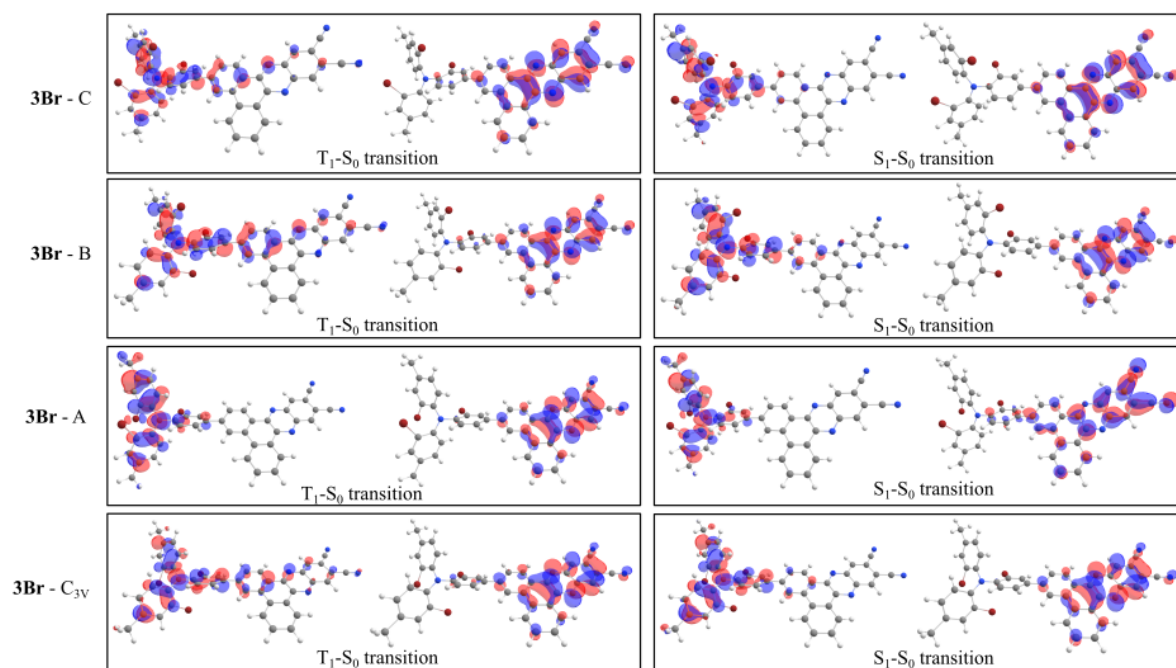

**Figure S9.** Natural transition orbitals for the  $S_1-S_0$  and  $T_1-S_0$  transitions for selected **3Br** rotamers. NTO indicate almost negligible role of bromine atoms in the electronic transitions.

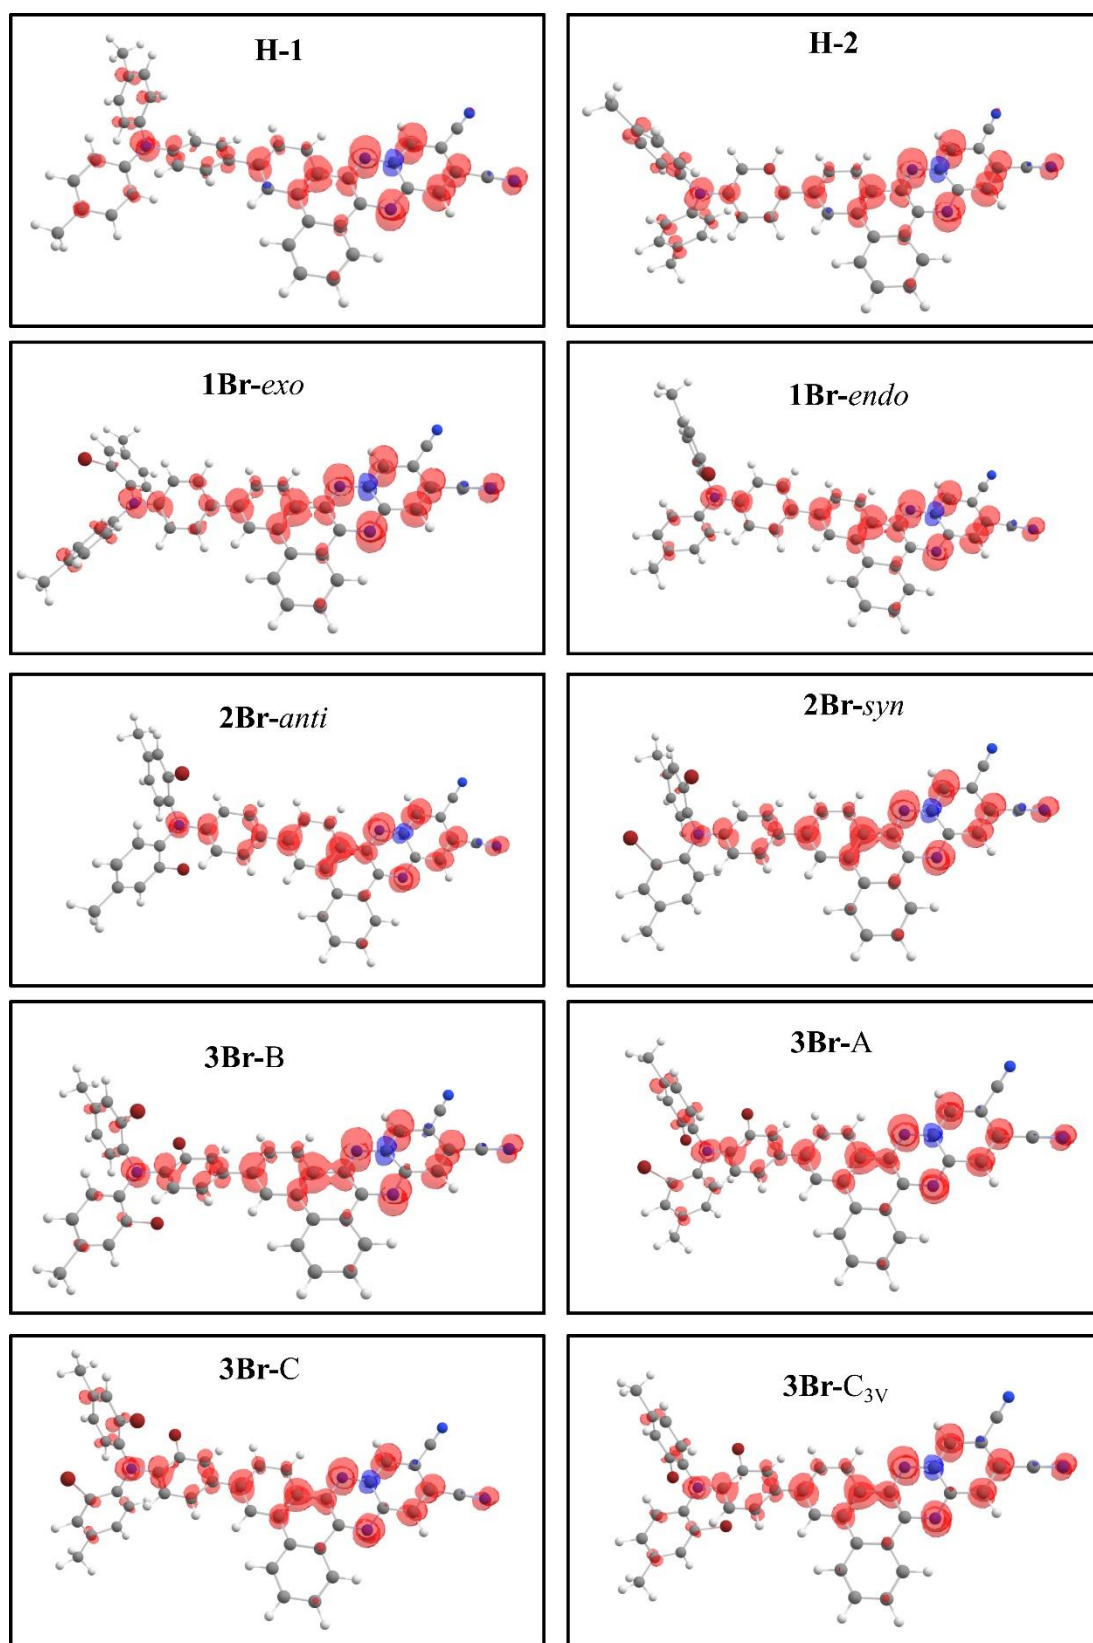

**Figure S10.** Triplet spin density distribution (TSDD) maps

### Section S3: NMR spectra of target emitters

$^1\text{H}$  NMR spectrum of 3-(4-((2-bromo-4-methylphenyl)(*p*-tolyl)amino)phenyl)-dibenzo[*a,c*]phenazine-11,12-dicarbonitrile (**1Br**) in  $\text{CDCl}_3$

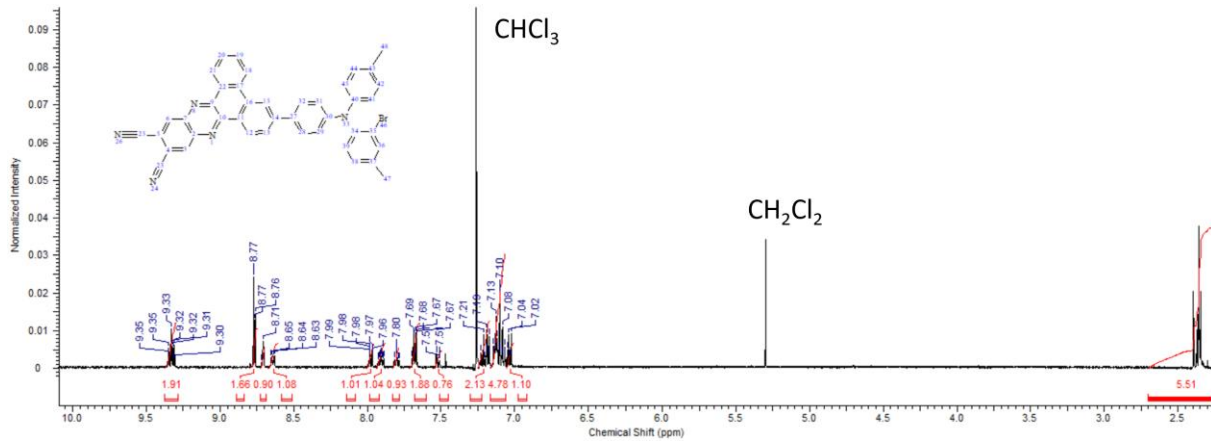

$^1\text{H}$  NMR spectrum of 3-(4-(bis(2-bromo-4-methylphenyl)amino)phenyl)dibenzo[*a,c*]phenazine-11,12-dicarbonitrile (**2Br**) in  $\text{CDCl}_3$ .

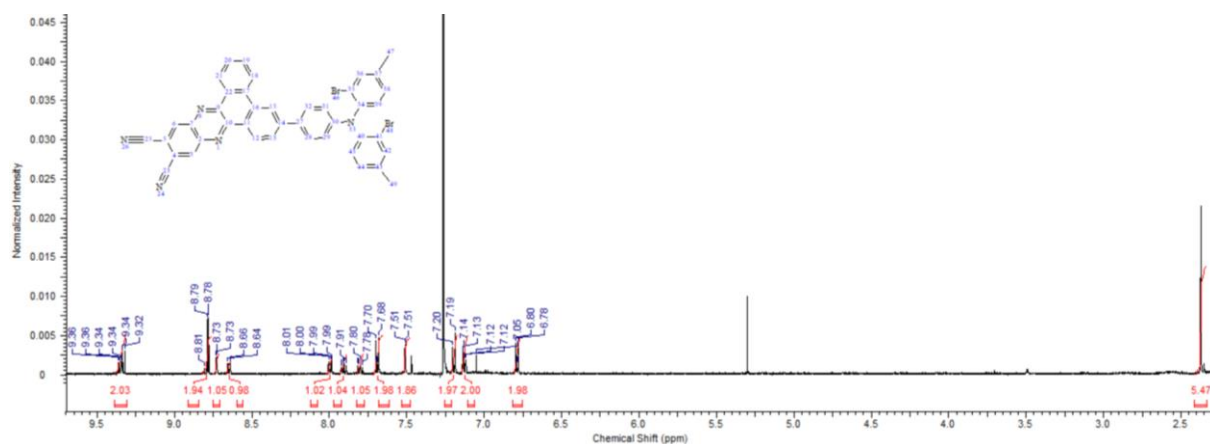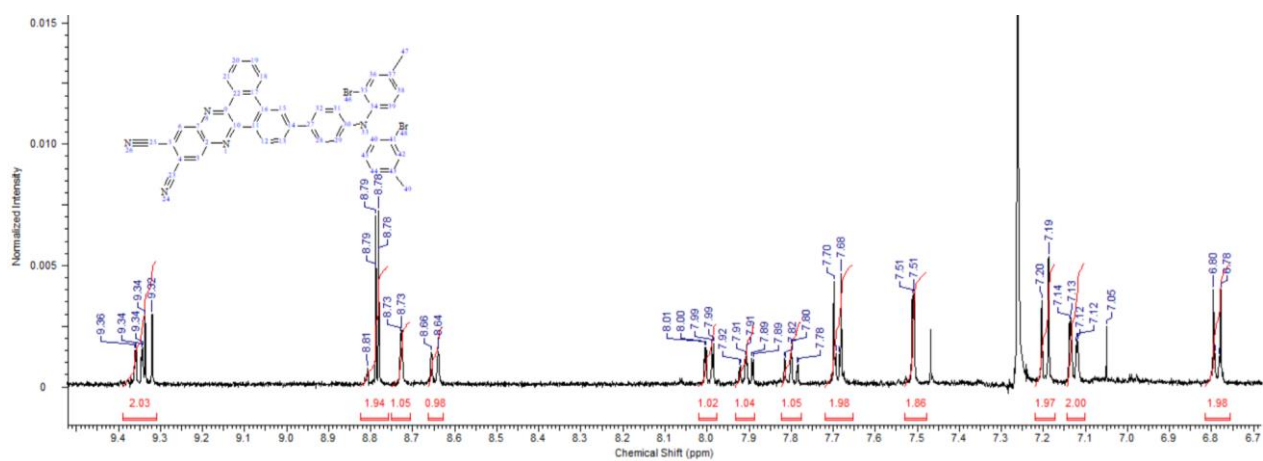

$^1\text{H}$  NMR spectrum of 3-(4-(bis(2-bromo-4-methylphenyl)amino)phenyl)dibenzo[*a,c*]phenazine-11,12-dicarbonitrile (**3Br**) in  $\text{CDCl}_3$ .

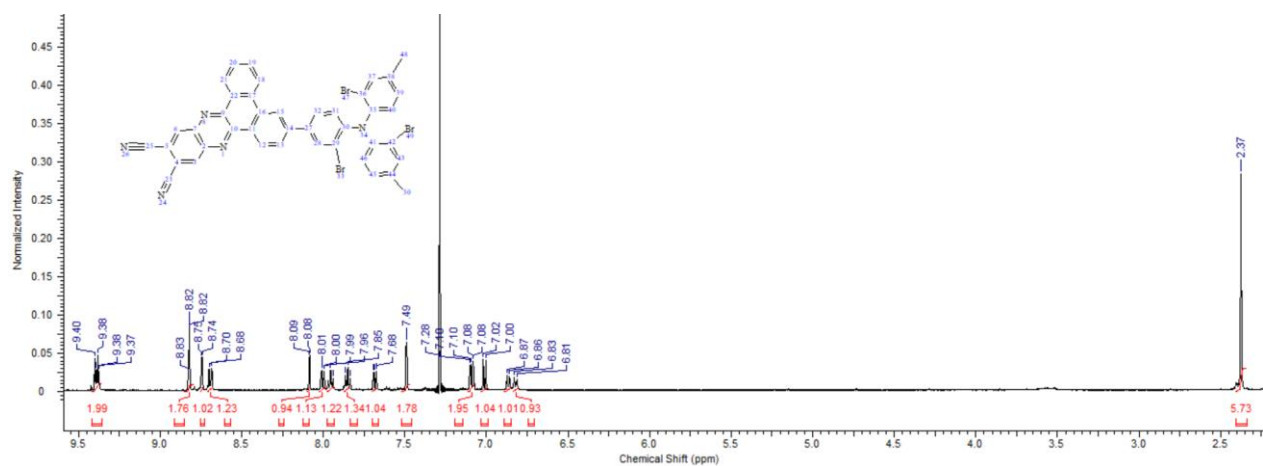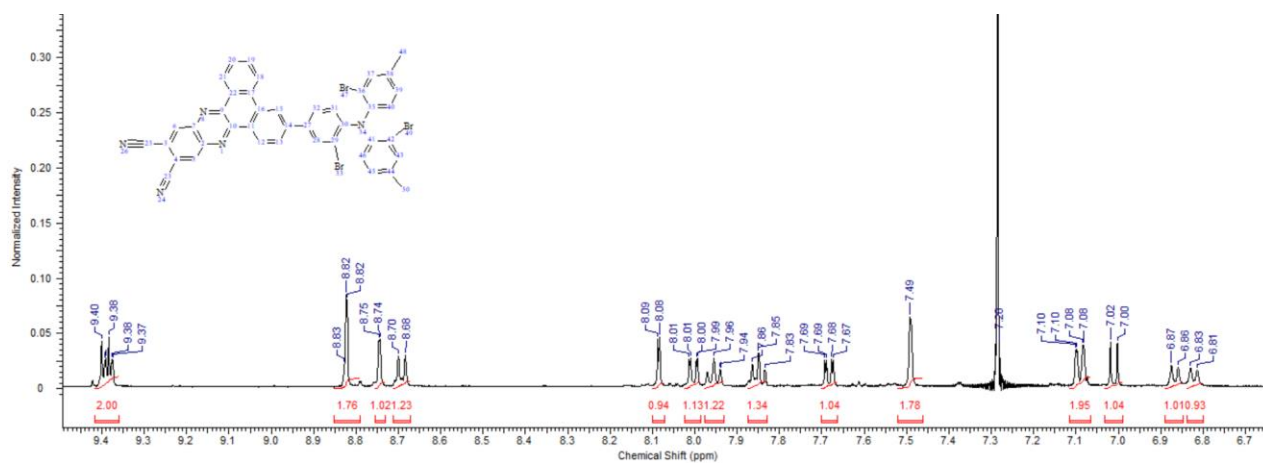



$^1\text{H}$  NMR spectrum of 3-(4-(bis(2-bromo-4-methylphenyl)amino)phenyl)phenanthrene-9,10-dione (**2**) in  $\text{CDCl}_3$ .

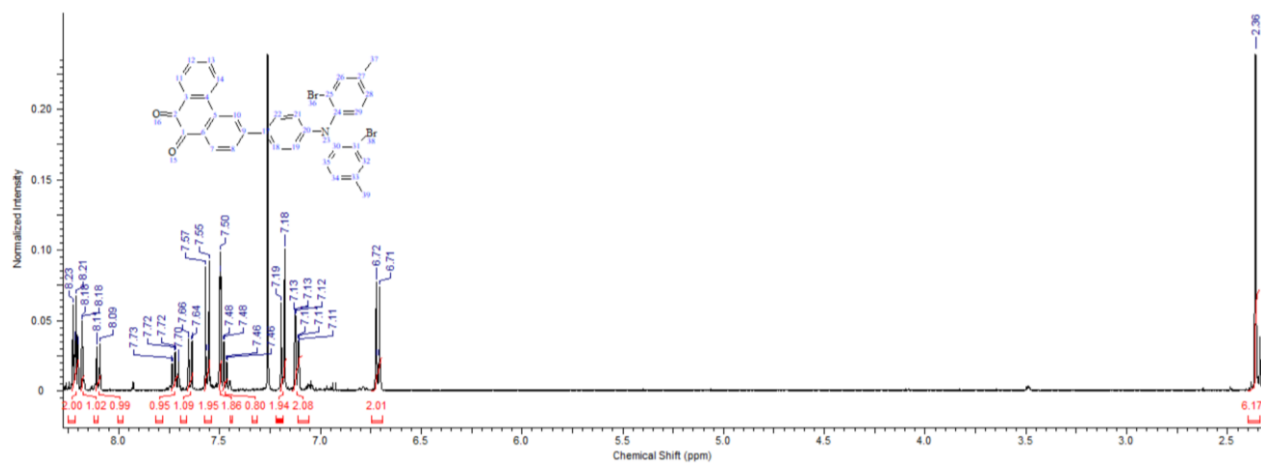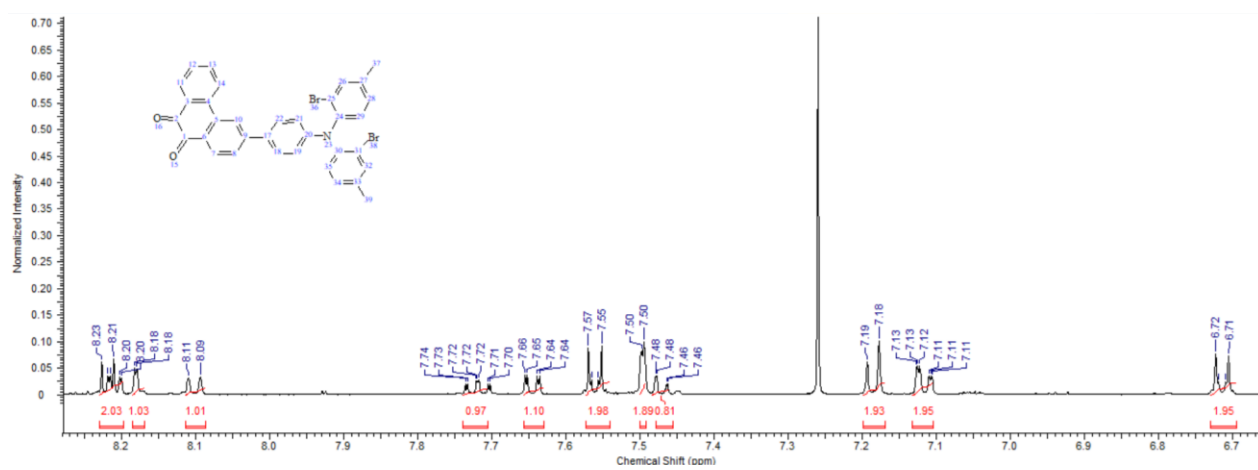

<sup>1</sup>H NMR spectrum of 3-(4-(bis(2-bromo-4-methylphenyl)amino)-3-bromophenyl)-phenanthrene-9,10-dione (**3**) in CDCl<sub>3</sub>

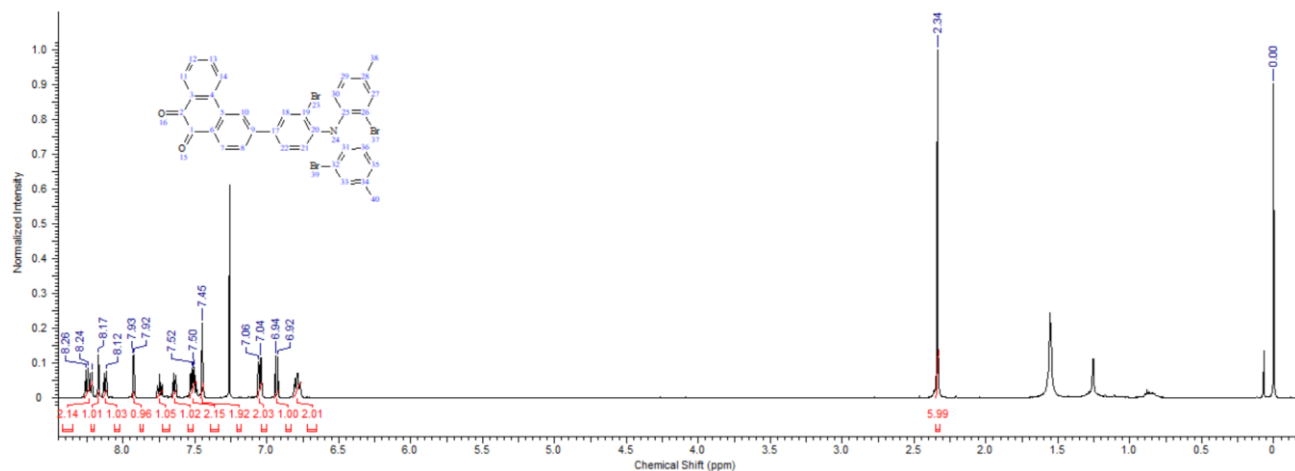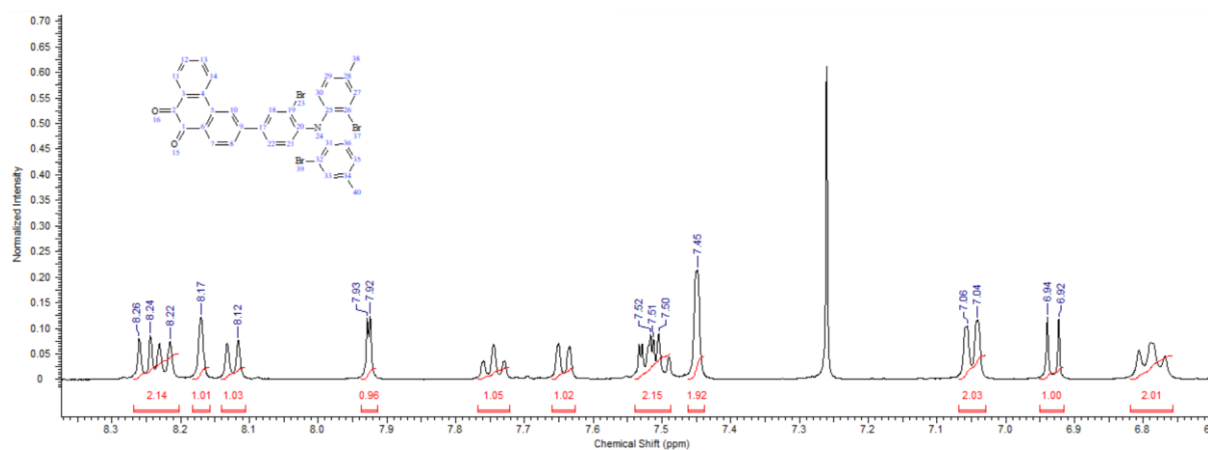

#### Section S4: Determination of photophysical parameters

PL decay curves (presented in **Figures 2F** and **S4**) were fitted with the multiexponential equation:

$$I(t) = A_0 + \sum_{i=1}^n A_i \exp(-t/\tau_i) \quad (\text{S6})$$

where  $A_i$  is the pre-exponential factor,  $\tau_i$  is the decay time and  $I(t)$  is emission intensity. Average lifetimes of prompt ( $\tau_{PF}$ ) and delayed fluorescence ( $\tau_{DF}$ ) were determined using the following formula:

$$\tau_{PF}, \tau_{DF} = \sum_{i=1}^n f_i \tau_i, \quad (\text{S7})$$

where  $f_i$  is fractional contribution of  $i$ -th component expressed as:

$$f_i = \frac{A_i \tau_i}{\sum_{i=1}^n A_i \tau_i} \quad (\text{S8})$$

The ratio of DF and PF quantum yields  $\varphi_{DF}/\varphi_{PF}$  was determined as follows:

$$\frac{\varphi_{DF}}{\varphi_{PF}} = \frac{\sum_{i=1}^n \tau_{DF(i)} A_{DF(i)}}{\sum_{j=1}^n \tau_{PF(j)} A_{PF(j)}} \quad (\text{S9})$$

where  $A_{DF(i)}$  and  $A_{PF(j)}$  is the pre-exponential factor of delayed and prompt fluorescence component, respectively;  $\tau_{DF(i)}$  and  $\tau_{PF(j)}$  is the lifetime of delayed and prompt fluorescence component, respectively. The rate constants of radiative ( $k_r$ ) and nonradiative ( $k_{nr}$ ) decay and intersystem crossing ( $k_{ISC}$ ) are given by equations[S2]:

$$k_r = \frac{\varphi_{PF}}{\tau_{PF}}, \quad (\text{S10})$$

$$k_{ISC} = \frac{\varphi_{DF}}{\varphi_{PF} \tau_{PF}}, \quad (\text{S11})$$

$$k_{nr} = \frac{1}{\tau_{PF}} - (k_r + k_{ISC}). \quad (\text{S12})$$

where  $\varphi$  is PLQY ( $\varphi_{DF} + \varphi_{PF}$ ). Further, the quantum yields for ISC and rISC were calculated as

$$\varphi_{ISC} = k_{ISC} \tau_{PF}, \quad (\text{S13})$$

$$\varphi_{rISC} = \frac{1 - \varphi_{PF}/\varphi}{\varphi_{ISC}}. \quad (\text{S14})$$

Finally, the rate constant of rISC ( $k_{rISC}$ ) was calculated as

$$k_{rISC} = \frac{\varphi_{rISC}}{\tau_{DF}} \left( \frac{\varphi}{\varphi_{PF}} \right). \quad (\text{S15})$$

Thus obtained photophysical parameters are presented in **Table 2** (main text).

## References

[S1] M. Mońka, I. E. Serdiuk, K. Kozakiewicz, E. Hoffman, J. Szumilas, A. Kubicki, S. Y. Park and P. Bojarski, *Mater. Chem. C*. 2022, **10**, 7925-7934.

[S2] Tao, Y.; Yuan, K.; Chen, T.; Xu, P.; Li, H.; Chen, R.; Zheng, C.; Zhang, L.; Huang, W. Thermally Activated Delayed Fluorescence Materials Towards the Breakthrough of Organoelectronics. *Adv. Mater.* **2015**, *26*, 7931 – 7958.
